# Supplementary material for: Fabrication of continuous apatite-graded collagen spongesviaelectrolysis method
Source: Royal Society of Chemistry journal article supplement (doi:10.1039/c9tb00791a), 2019-01-01
Supplement: c9tb00791a1.pdf [file c9tb00791a1.pdf]

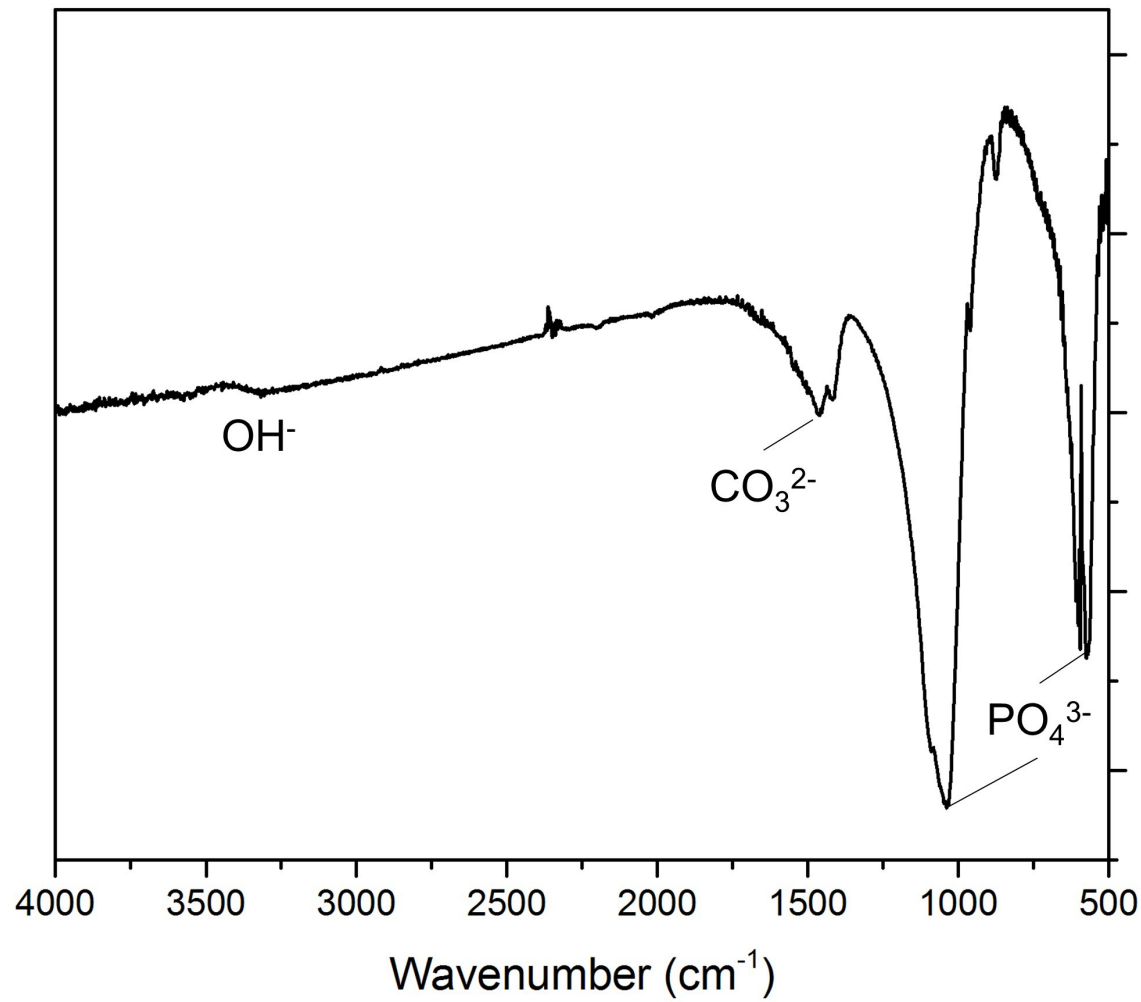

**Supporting Figure 1.** FTIR spectra of remaining ashes of Col0.5HAp0.1 sponge obtained after heating at 600°C
